# Supplementary material for: Sensitivity of prehospital stroke scales for different intracranial large vessel occlusion locations
Source: PubMed Central journal article supplement (PMC8370085; doi:10.1177/23969873211015861), 2021-05-13
Supplement: sj-pdf-1-eso-10.1177_23969873211015861.pdf [file sj-pdf-1-eso-10.1177_23969873211015861.pdf]

## Supplementary material

Sensitivity of prehospital stroke scales for different intracranial large vessel occlusion locations

Table 1: Prehospital stroke scales with corresponding NIHSS items and breakdowns

Figure 1: Sensitivity of prehospital stroke scales for intracranial ICA occlusions

Figure 2: Sensitivity of prehospital stroke scales for ICA-T occlusions

Figure 3: Sensitivity of prehospital stroke scales for proximal M1 occlusions

Figure 4: Sensitivity of prehospital stroke scales for distal M1 occlusions

Figure 5: Sensitivity of prehospital stroke scales for M2 occlusions

Table 1. Prehospital stroke with corresponding NIHSS items and breakdowns.

| Item and NIHSS correspondence          | RACE <sup>1</sup> | C-STAT <sup>2</sup> | PASS <sup>3</sup> | G-FAST <sup>4</sup> | FAST-ED <sup>5</sup> | FAST-PLUS <sup>6</sup> | EMSA <sup>7</sup> | CG-FAST <sup>8</sup> | NIHSS-8 <sup>9</sup> | 3I SS <sup>10</sup> | SAVE <sup>11</sup> | FPSS <sup>12</sup> | sNIHSS-EMS <sup>13</sup> | 3 Item NIHSS <sup>14</sup> |
|----------------------------------------|-------------------|---------------------|-------------------|---------------------|----------------------|------------------------|-------------------|----------------------|----------------------|---------------------|--------------------|--------------------|--------------------------|----------------------------|
| <b>LOC responsiveness - 1a</b>         |                   |                     |                   |                     |                      |                        |                   |                      |                      |                     |                    |                    |                          |                            |
| 0 - Alert                              |                   |                     |                   |                     |                      |                        |                   |                      | 0                    | 0                   |                    |                    | 0                        |                            |
| 1 - Rousable to minor stimulation      |                   |                     |                   |                     |                      |                        |                   |                      | 1                    | 1                   |                    |                    | 1                        |                            |
| 2 - Rousable to painful stimulation    |                   |                     |                   |                     |                      |                        |                   |                      | 2                    | 2                   |                    |                    | 2                        |                            |
| 3 - Reflex response/unrousable         |                   |                     |                   |                     |                      |                        |                   |                      | 3                    |                     |                    |                    | 3                        |                            |
| <b>LOC questions - 1b</b>              |                   |                     |                   |                     |                      |                        |                   |                      |                      |                     |                    |                    |                          |                            |
| 0 – answers correctly                  |                   |                     | 0                 |                     |                      |                        |                   | 0                    | 0                    |                     |                    |                    |                          |                            |
| 1 – incorrectly answer one question    |                   | 0                   |                   |                     |                      |                        |                   |                      | 1                    |                     |                    |                    |                          |                            |
| 2 – incorrectly answers both questions |                   | 1^                  | 1                 |                     |                      |                        |                   | 1                    | 2                    |                     |                    |                    |                          |                            |
| <b>LOC commands - 1c</b>               |                   |                     |                   |                     |                      |                        |                   |                      |                      |                     |                    |                    |                          |                            |
| 0 – performs both tasks                | 0*                | 0                   |                   |                     |                      |                        |                   |                      | 0                    |                     |                    |                    |                          |                            |
| 1 - performs one task                  | 1*                |                     |                   |                     |                      |                        |                   |                      | 1                    |                     |                    |                    |                          |                            |
| 2- performs neither tasks              | 2*                | 1^                  |                   |                     |                      |                        |                   |                      | 2                    |                     |                    |                    |                          |                            |
| <b>Best gaze - 2</b>                   |                   |                     |                   |                     |                      |                        |                   |                      |                      |                     |                    |                    |                          |                            |
| 0 - normal                             | 0                 | 0                   | 0                 | 0                   | 0                    |                        | 0                 | 0                    | 0                    | 0                   | 0                  | 0                  |                          |                            |
| 1 – partial gaze palsy                 |                   |                     |                   |                     | 1                    |                        |                   |                      | 1                    | 1                   |                    |                    |                          |                            |
| 2 – forced deviation                   | 1                 | 2                   | 1                 | 1                   | 2                    |                        | 1                 | 1                    | 2                    | 2                   | 1                  | 4                  |                          |                            |
| <b>Visual fields - 3</b>               |                   |                     |                   |                     |                      |                        |                   |                      |                      |                     |                    |                    |                          |                            |
| No visual loss                         |                   |                     |                   |                     |                      |                        |                   |                      |                      |                     | 0                  | 0                  |                          |                            |
| Partial hemianopia                     |                   |                     |                   |                     |                      |                        |                   |                      |                      |                     |                    |                    |                          |                            |
| Complete hemianopia                    |                   |                     |                   |                     |                      |                        |                   |                      |                      |                     | 1                  | 1                  |                          |                            |
| Bilateral hemianopia                   |                   |                     |                   |                     |                      |                        |                   |                      |                      |                     |                    |                    |                          |                            |
| <b>Facial paresis - 4</b>              |                   |                     |                   |                     |                      |                        |                   |                      |                      |                     |                    |                    |                          |                            |
| 0 – normal                             | 0                 |                     |                   | 0                   | 0                    | 0                      | 0                 | 0                    | 0                    |                     |                    | 0                  | 0                        |                            |
| 1 – minor paralysis                    | 1                 |                     |                   |                     |                      |                        |                   |                      | 1                    |                     |                    |                    | 1                        |                            |
| 2 – partial paralysis                  |                   |                     |                   | 1                   |                      | 1                      | 1                 | 1                    | 2                    |                     |                    | 1                  | 2                        |                            |
| 3 – complete paralysis                 | 2                 |                     |                   |                     |                      |                        |                   |                      | 3                    |                     |                    |                    | 3                        |                            |
| <b>Arm - 5a and 5b</b>                 |                   |                     |                   |                     |                      |                        |                   |                      |                      |                     |                    |                    |                          |                            |
| 0 – no drift                           |                   |                     | 0                 | 0                   | 0                    | 0                      | 0                 | 0                    | L                    | R                   |                    |                    | L                        | R                          |
| 1 – drift                              | 0                 | 0                   |                   |                     |                      |                        |                   |                      | 0                    | 0                   | 0~                 | 0~                 | 0                        | 0                          |
| 2 – some effort against gravity        |                   |                     |                   |                     |                      |                        |                   |                      | 1                    | 1                   | 1~                 |                    | 1                        | 1                          |
| 3 – no effort against gravity          | 1                 |                     |                   | 1                   | 1                    | 0                      | 1                 | 1                    | 2                    | 2                   | 2~                 | 1∞                 | 1~                       | 2                          |
| 4 – no movement                        | 2                 | 1                   | 1                 |                     | 2                    | 1                      |                   |                      | 3                    | 3                   |                    |                    |                          | 3                          |
|                                        |                   |                     |                   |                     |                      | #                      |                   |                      | 4                    | 4                   |                    |                    |                          | 4                          |
| <b>Leg - 6a and 6b</b>                 |                   |                     |                   |                     |                      |                        |                   |                      |                      |                     |                    |                    |                          |                            |
| 0 – no drift                           |                   |                     |                   |                     |                      |                        |                   |                      |                      |                     |                    |                    | L                        | R                          |
| 1 – drift                              | 0                 |                     |                   |                     |                      |                        | 0                 |                      |                      |                     | 0~                 | 0~                 | 0                        | 0                          |
| 2 – some effort against gravity        |                   |                     |                   |                     |                      |                        |                   |                      |                      |                     | 1~                 |                    | 1                        | 1                          |
| 3 – no effort against gravity          | 1                 |                     |                   |                     |                      |                        | 1**               |                      |                      |                     |                    | 1~                 | 2                        | 2                          |
| 4 – no movement                        | 2                 |                     |                   |                     |                      |                        |                   |                      |                      |                     | 2~                 |                    | 3                        | 3                          |
|                                        |                   |                     |                   |                     |                      |                        |                   |                      |                      |                     |                    |                    | 4                        | 4                          |
| <b>Sensory - 8</b>                     |                   |                     |                   |                     |                      |                        |                   |                      |                      |                     |                    |                    |                          |                            |
| 0 - normal                             |                   |                     |                   |                     |                      |                        |                   |                      |                      |                     |                    |                    | 0                        | 0                          |
| 1 - mild-moderate loss                 |                   |                     |                   |                     |                      |                        |                   |                      |                      |                     |                    |                    | 1                        | 1                          |
| 2 - complete loss                      |                   |                     |                   |                     |                      |                        |                   |                      |                      |                     |                    |                    | 2                        | 2                          |

| Language & Dysarthria - 9 and 10         |    |  |  |   |   |   |   |   | only 10 |  |  |   | 9 | 10 |   |
|------------------------------------------|----|--|--|---|---|---|---|---|---------|--|--|---|---|----|---|
| 0 – absent                               |    |  |  | 0 | 0 | 0 | 0 | 0 | 0       |  |  | 0 | 0 | 0  | 0 |
| 1 – mild to moderate                     |    |  |  |   | 1 |   |   |   | 1       |  |  |   |   | 1  | 1 |
| 2 – severe                               |    |  |  | 1 |   | 1 | 2 | 1 | 2       |  |  | 1 | 1 | 2  | 2 |
| 3 - mute                                 |    |  |  |   | 2 |   |   |   | x       |  |  |   |   | 3  | x |
| <b>Neglect - 11</b>                      |    |  |  |   |   |   |   |   |         |  |  |   |   |    |   |
| 0 – absent                               | 0‡ |  |  |   | 0 |   |   |   | 0       |  |  |   |   |    | 0 |
| 1 – extinction in one modality           | 1‡ |  |  |   | 1 |   |   |   | 1       |  |  |   |   |    | 1 |
| 2 – extinction in more than one modality | 2‡ |  |  |   | 2 |   |   |   | 2       |  |  |   |   |    | 2 |

^ 1 point if only one of questions and 1 of the commands performed

§ only answers

\* if right hemiparesis

‡ if left hemiparesis

# score only if FAST positive

\*\* 1 point if item left ≠ right

~ score highest of four extremities

∞ only scored when asymmetric drift or weakness

RACE: Rapid Arterial occlusion Evaluation, C-STAT: Cincinnati Stroke Triage Assessment Tool, PASS: Prehospital Acute Stroke Severity scale, G-FAST: Gaze-Face-Arm-Speech-Time, FAST-ED: Field Assessment Stroke Triage for Emergency Destination, EMSA: Emergency Medical Stroke Assessment, CG-FAST: Conveniently-Grasped Field Assessment Stroke Triage, NIHSS-8: National Institutes of Health Stroke Scale-8, 3I SS: 3-Item Stroke Scale, SAVE: Speech Arm Vision Eyes Scale, FPSS: Finnish Prehospital Stroke Scale, sNIHSS-EMS: shortened NIH Stroke Scale for emergency medical services.

Figure 1: Sensitivity of prehospital stroke scales for intracranial ICA occlusions

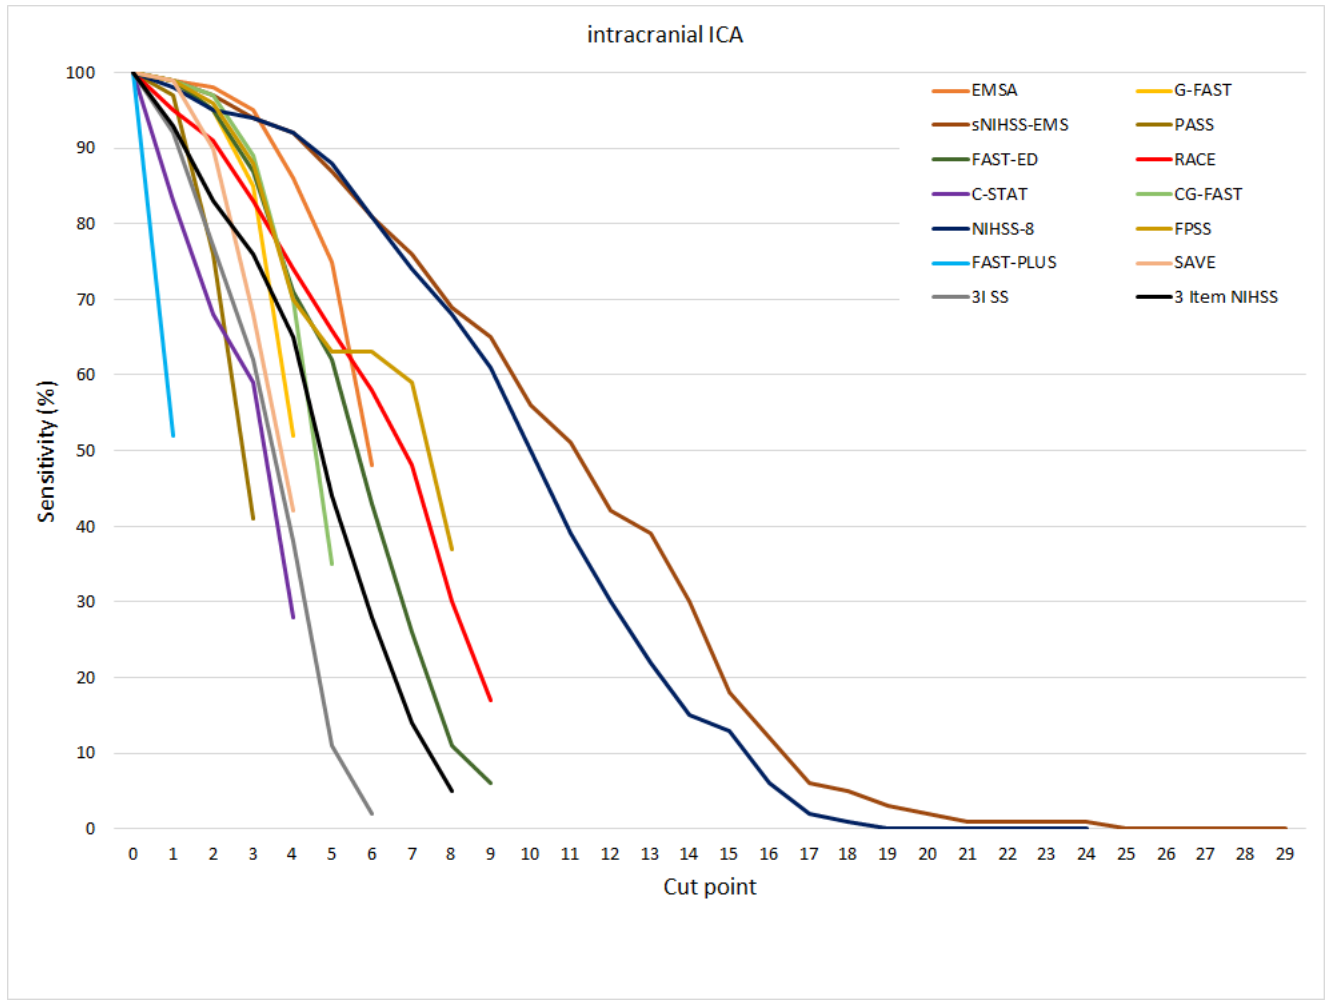

Figure 2: Sensitivity of prehospital stroke scales for ICA-T occlusions

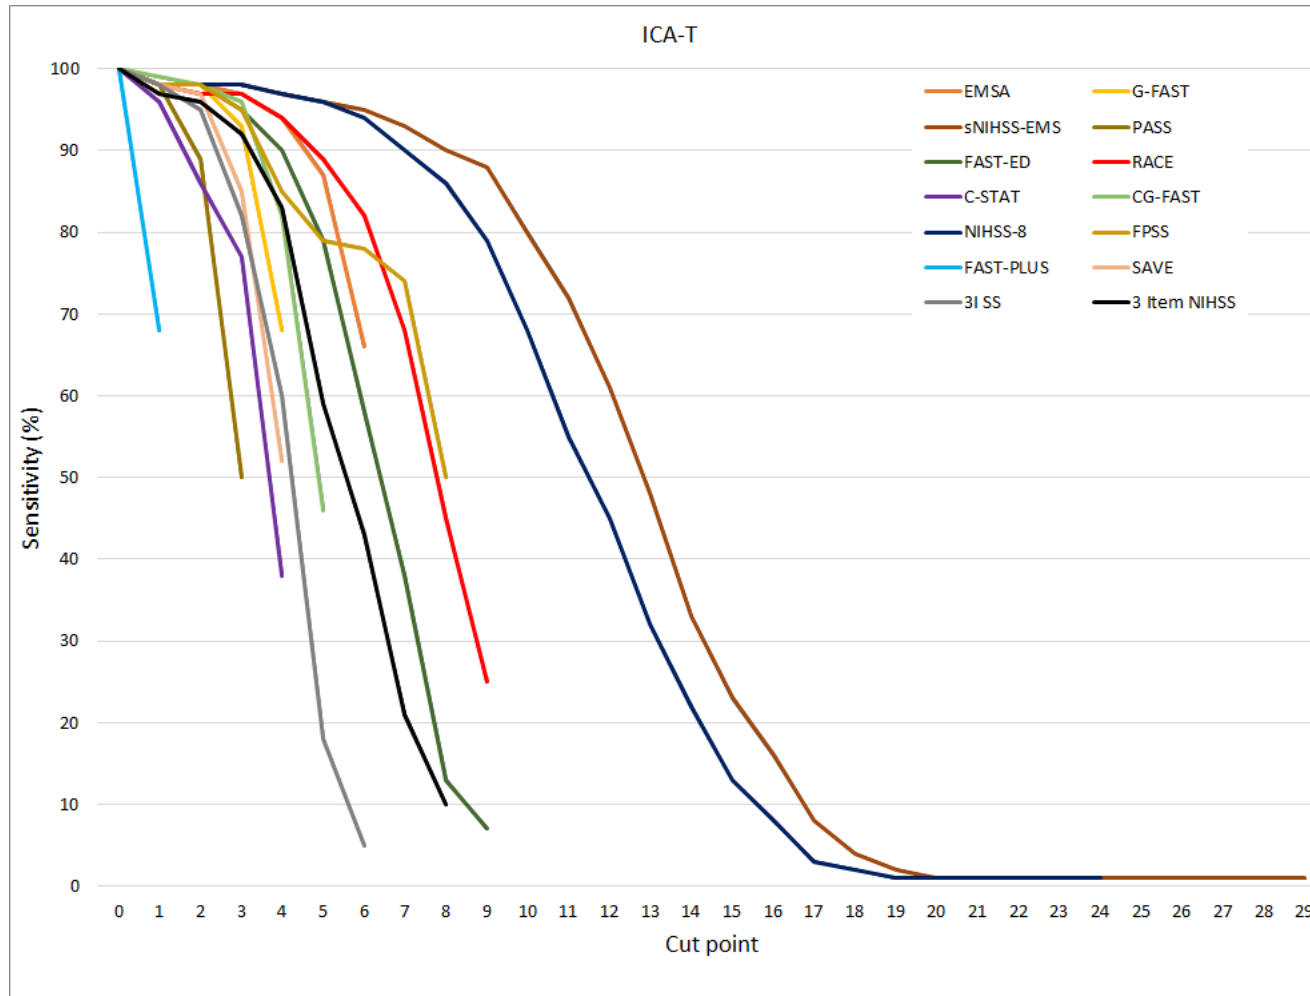

Figure 3: Sensitivity of prehospital stroke scales for proximal M1 occlusions

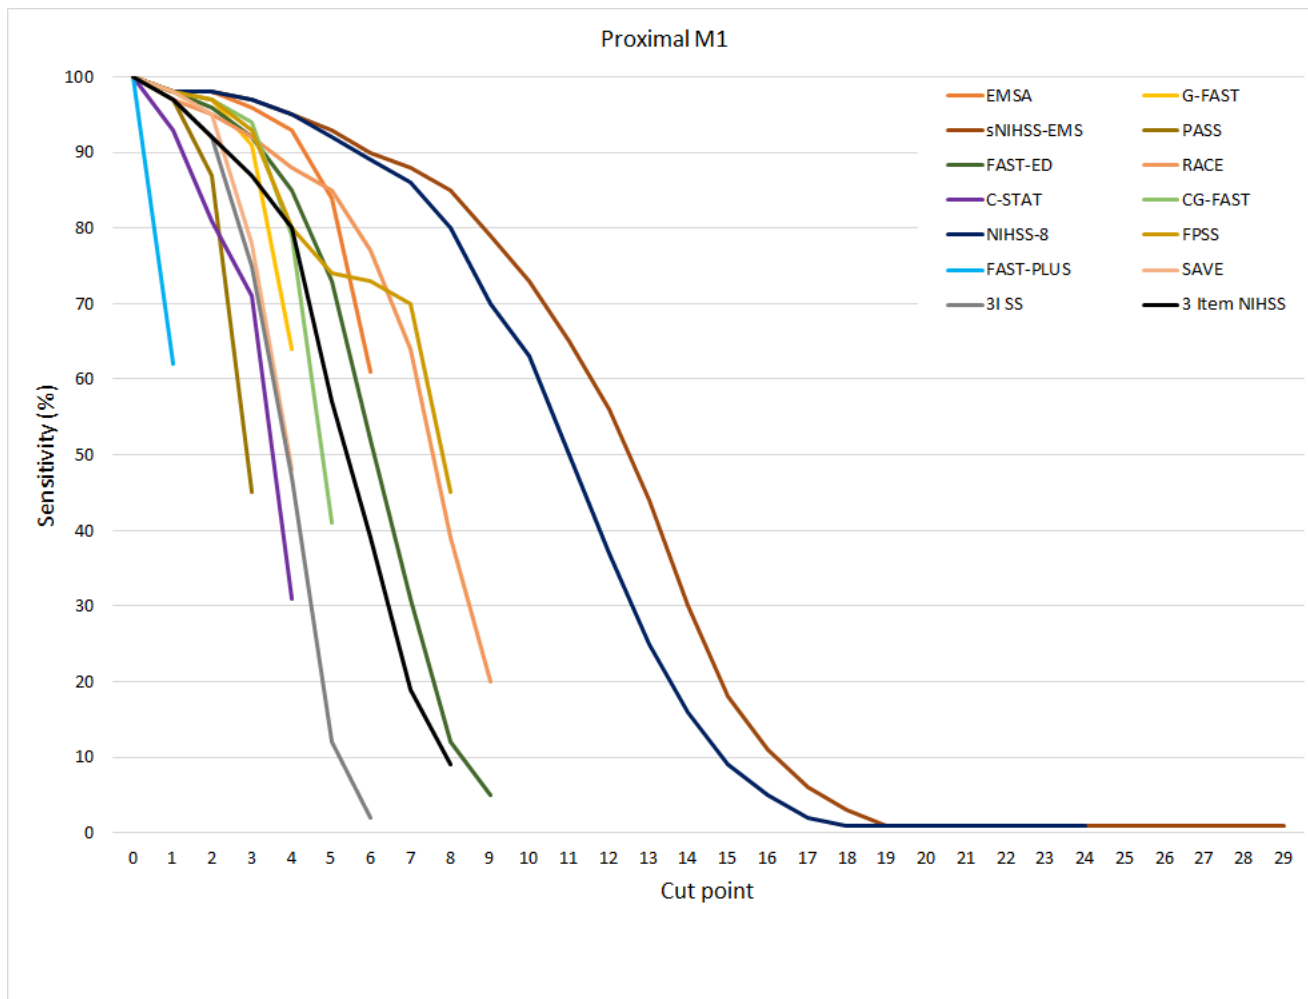

Figure 4: Sensitivity of prehospital stroke scales for distal M1 occlusions

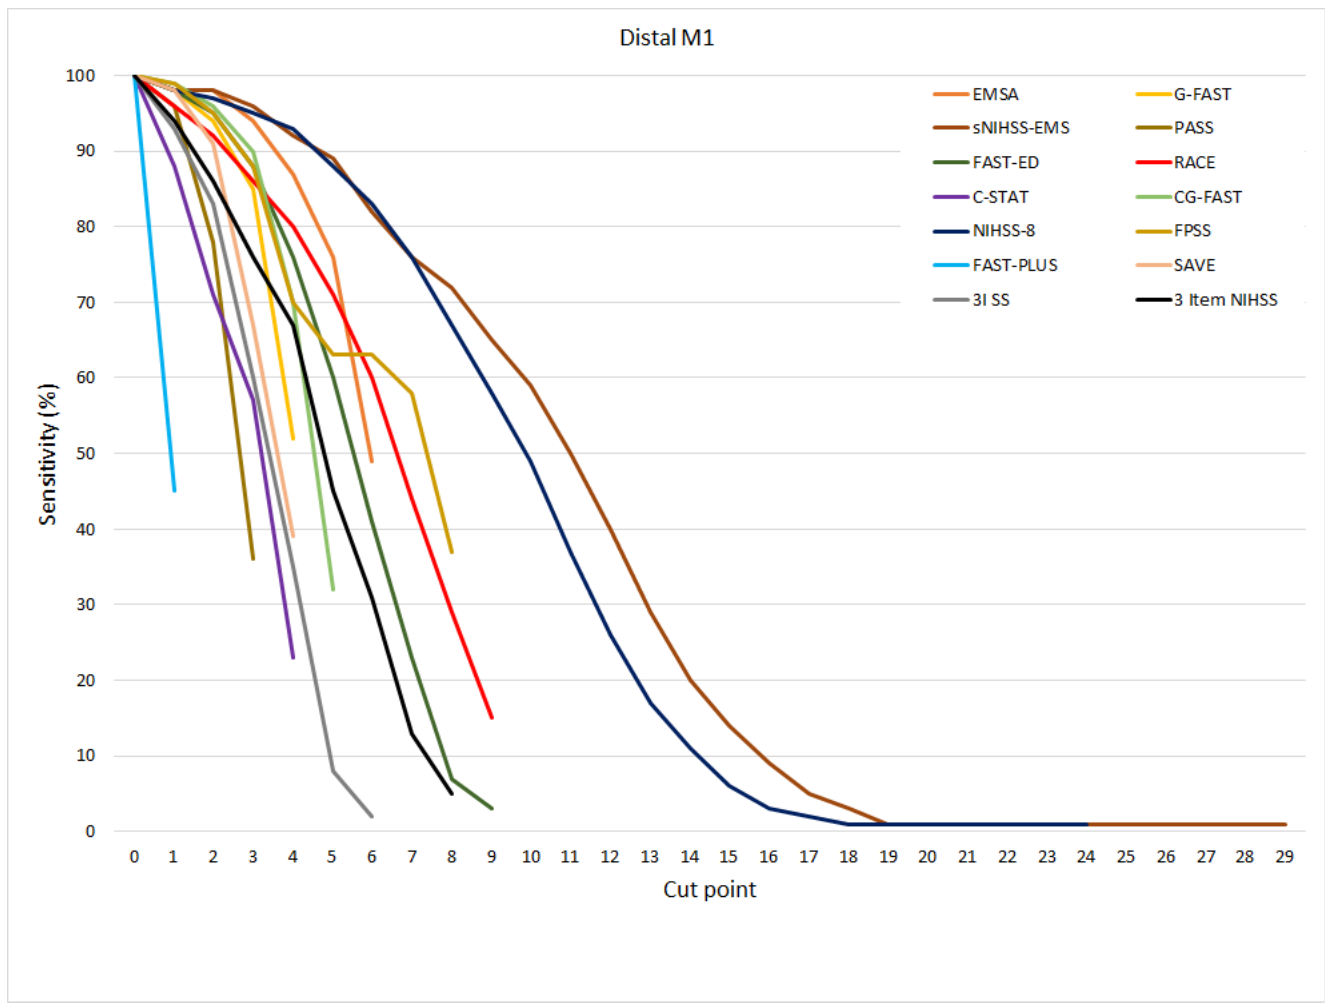

Figure 5: Sensitivity of prehospital stroke scales for M2 occlusions

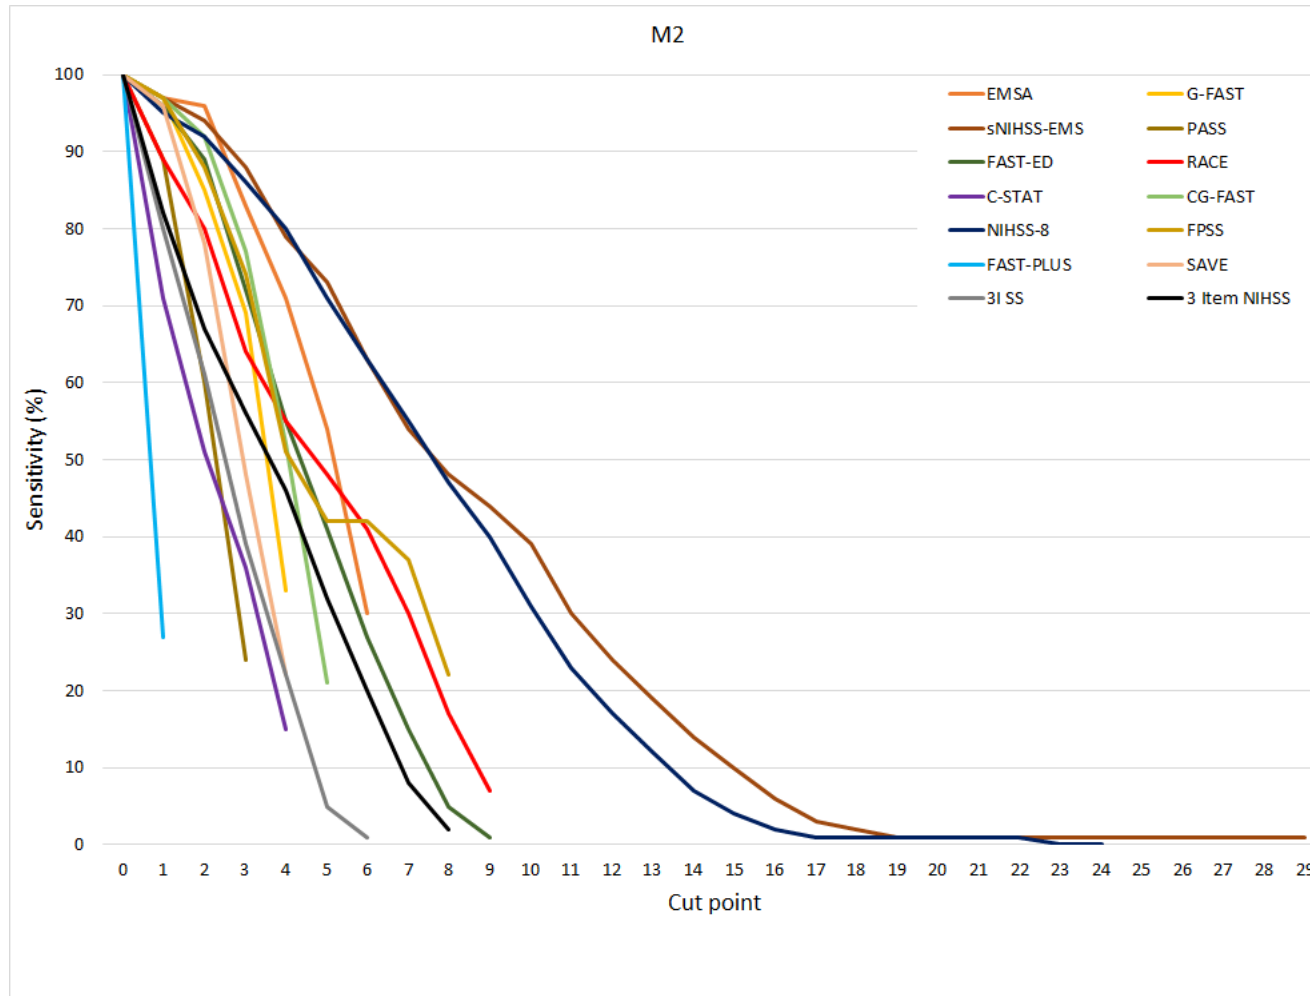



## References

1. Perez de la Ossa N, Carrera D, Gorchs M, Querol M, Millan M, Gomis M, et al. Design and validation of a prehospital stroke scale to predict large arterial occlusion: The rapid arterial occlusion evaluation scale. *Stroke*. 2014;45:87-91
2. Katz BS, McMullan JT, Sucharew H, Adeoye O, Broderick JP. Design and validation of a prehospital scale to predict stroke severity: Cincinnati prehospital stroke severity scale. *Stroke*. 2015;46:1508-1512
3. Hastrup S, Damgaard D, Johnsen SP, Andersen G. Prehospital acute stroke severity scale to predict large artery occlusion: Design and comparison with other scales. *Stroke*. 2016;47:1772-1776
4. Scheitz JF, Abdul-Rahim AH, MacIsaac RL, Cooray C, Sucharew H, Kleindorfer D, et al. Clinical selection strategies to identify ischemic stroke patients with large anterior vessel occlusion: Results from sits-istr (safe implementation of thrombolysis in stroke international stroke thrombolysis registry). *Stroke*. 2017;48:290-297
5. Lima FO, Silva GS, Furie KL, Frankel MR, Lev MH, Camargo EC, et al. Field assessment stroke triage for emergency destination: A simple and accurate prehospital scale to detect large vessel occlusion strokes. *Stroke*. 2016;47:1997-2002
6. Vaclavik D, Bar M, Klecka L, Holes D, Cabal M, Mikulik R. Prehospital stroke scale (fast plus test) predicts patients with intracranial large vessel occlusion. *Brain Behav*. 2018:e01087
7. Gropen TI, Boehme A, Martin-Schild S, Albright K, Samai A, Pishanidar S, et al. Derivation and validation of the emergency medical stroke assessment and comparison of large vessel occlusion scales. *J Stroke Cerebrovasc Dis*. 2018;27:806-815
8. Gong X, Chen Z, Shi F, Zhang M, Xu C, Zhang R, et al. Conveniently-grasped field assessment stroke triage (cg-fast): A modified scale to detect large vessel occlusion stroke. *Front Neurol*. 2019;10:390
9. Demeestere J, Garcia-Esperon C, Lin L, Bivard A, Ang T, Smoll NR, et al. Validation of the national institutes of health stroke scale-8 to detect large vessel occlusion in ischemic stroke. *J Stroke Cerebrovasc Dis*. 2017;26:1419-1426
10. Singer OC, Dvorak F, du Mesnil de Rochemont R, Lanfermann H, Sitzer M, Neumann-Haefelin T. A simple 3-item stroke scale: Comparison with the national institutes of health stroke scale and prediction of middle cerebral artery occlusion. *Stroke*. 2005;36:773-776
11. Keenan KJ, Smith WS. The speech arm vision eyes (save) scale predicts large vessel occlusion stroke as well as more complicated scales. *J Neurointerv Surg*. 2018
12. Ollikainen JP, Janhunen HV, Tynkkynen JA, Mattila KM, Halinen MM, Oksala NK, et al. The finnish prehospital stroke scale detects thrombectomy and thrombolysis candidates-a propensity score-matched study. *J Stroke Cerebrovasc Dis*. 2018;27:771-777
13. Purrucker JC, Hartig F, Richter H, Engelbrecht A, Hartmann J, Auer J, et al. Design and validation of a clinical scale for prehospital stroke recognition, severity grading and prediction of large vessel occlusion: The shortened nih stroke scale for emergency medical services. *BMJ Open*. 2017;7:e016893
14. Zuckerman SL, Sivaganesan A, Zhang C, Dewan MC, Morone PJ, Ganesh Kumar N, et al. Maximizing efficiency and diagnostic accuracy triage of acute stroke patients: A case-control study. *Interv Neuroradiol*. 2016;22:304-309
